# Supplementary material
Source: PubMed Central journal article supplement (PMC2941342)
Supplement: 1005769107_pnas.201005769SI.pdf [file 1005769107_pnas.201005769SI.pdf]

# Supporting Information

Rimoin et al. 10.1073/pnas.1005769107

**Table S1. Reported human monkeypox cases in Africa: 1970–2007**

| Regions                                     | 1970–80* | 1981–6 <sup>†</sup> | 1996–7 <sup>‡</sup> | 2001–2004 <sup>‡</sup> | 2005–07 <sup>§</sup> | Total |
|---------------------------------------------|----------|---------------------|---------------------|------------------------|----------------------|-------|
| Africa <sup>¶</sup>                         | 11       | 8                   | 0                   | 3                      | 1                    | 23    |
| Democratic Republic of Congo (by province): |          |                     |                     |                        |                      |       |
| Bandundu                                    | 8        | 61 <sup>  </sup>    | —                   | 3                      | 6                    | 78    |
| Equateur                                    | 26       | 229 <sup>  </sup>   | —                   | 17                     | 16                   | 288   |
| Kasai Oriental <sup>††</sup>                | 12       | 37 <sup>  </sup>    | 88                  | 20                     | 795 <sup>  </sup>    | 952   |
| Kasai Occidental                            | 0        | 6                   | —                   | 6                      | 0                    | 12    |
| Kinshasa                                    | 0        | 0                   | —                   | 0                      | 2                    | 2     |
| Kivu                                        | 2        | 1                   | —                   | 0                      | 1                    | 4     |
| Oriental Province                           | 0        | 4                   | —                   | 6                      | 9                    | 19    |
| Total                                       | 59       | 346                 | 88                  | 55                     | 830                  | 1,378 |

\*Smallpox eradication program, DRC Ministry of Health (MoH).

<sup>†</sup>Disease surveillance program WHO-DRC MoH.

<sup>‡</sup>DRC MoH disease surveillance program.

<sup>§</sup>Including data from DRC MoH National disease surveillance and DRC MoH/UCLA active disease surveillance program.

<sup>¶</sup>Laboratory confirmed cases of human monkeypox reported throughout African continent, excluding the Democratic Republic of Congo.

<sup>||</sup>Intensified surveillance efforts.

<sup>††</sup>Including 760 MPX cases from health zones participating in active disease surveillance program.

**Table S2. Incidence of human monkeypox by predominant ecological characteristic in health zones with active surveillance, Democratic Republic of Congo, 2006–2007**

| Health zones by predominant ecological characteristic | 2006      |            |             | 2007      |           |            | 2006–2007                          |             |
|-------------------------------------------------------|-----------|------------|-------------|-----------|-----------|------------|------------------------------------|-------------|
|                                                       | MPX cases | Incidence* | 95% CI      | MPX cases | Incidence | 95% CI     | Avg. annual incidence <sup>†</sup> | 95% CI      |
| Savannah                                              |           |            |             |           |           |            |                                    |             |
| Lodja                                                 | 12        | 1.00       | 0.57–1.75   | 41        | 3.32      | 2.44–4.50  | 2.18                               | 1.66–2.85   |
| Ototo                                                 | 22        | 2.62       | 1.73–3.97   | 21        | 2.43      | 1.59–3.71  | 2.52                               | 1.87–3.40   |
| Omendjadi                                             | 25        | 2.95       | 2.00–4.35   | 24        | 2.74      | 1.84–4.08  | 2.84                               | 2.15–3.76   |
| Vangakete                                             | 33        | 4.10       | 2.92–5.76   | 24        | 2.89      | 1.94–4.30  | 3.49                               | 2.69–4.52   |
| Ecotone                                               |           |            |             |           |           |            |                                    |             |
| Katako Kombe                                          | 32        | 4.28       | 3.03–6.04   | 44        | 5.71      | 4.25–7.66  | 5.00                               | 4.06–6.26   |
| Djalo Ndjeka                                          | 33        | 6.33       | 4.51–8.89   | 36        | 6.70      | 4.84–9.27  | 6.52                               | 5.15–8.24   |
| Forest                                                |           |            |             |           |           |            |                                    |             |
| Lomela                                                | 52        | 7.21       | 5.50–9.46   | 80        | 10.77     | 8.65–13.40 | 9.02                               | 7.60–10.69  |
| Tshudi Loto                                           | 48        | 10.17      | 7.68–13.49  | 53        | 10.90     | 8.33–14.25 | 10.54                              | 8.68–12.81  |
| Kole                                                  | 102       | 16.60      | 13.68–20.14 | 78        | 12.31     | 9.87–15.36 | 14.42                              | 12.47–16.69 |
| Total                                                 | 359       | 5.30       | 4.78–5.88   | 401       | 5.75      | 5.21–6.34  | 5.53                               | 5.15–5.94   |

95% CI, 95% confidence interval.

\*Cumulative incidence calculated as number of cases divided by population at risk per 10,000 population.

<sup>†</sup>Avg. annual incidence, average annual incidence per 10,000 population.

**Table S3. Average annual incidence of human monkeypox by age in health zones with active disease surveillance, Democratic Republic of Congo: 1981–1986 and 2006–2007**

| Age group | 1981–1986 |            |                     | 2006–2007 |            |                     | 2006–7 vs. 1981–6            |                     |          |
|-----------|-----------|------------|---------------------|-----------|------------|---------------------|------------------------------|---------------------|----------|
|           | MPX cases | Incidence* | 95% CI <sup>†</sup> | MPX cases | Incidence* | 95% CI <sup>†</sup> | Incidence ratio <sup>‡</sup> | 95% CI <sup>†</sup> | P values |
| 0–4       | 74        | 1.43       | 1.14–1.80           | 95        | 17.06      | 13.96–20.85         | 11.90                        | 8.78–16.12          | <0.001   |
| 5–9       | 46        | 1.15       | 0.87–1.54           | 104       | 16.48      | 13.60–19.96         | 14.27                        | 10.08–20.18         | <0.001   |
| 10–14     | 7         | 0.20       | 0.08–0.41           | 107       | 20.26      | 16.77–24.48         | 100.93                       | 46.98–216.80        | <0.001   |
| 15–19     | 0         | 0.00       | —                   | 50        | 13.71      | 10.40–18.06         | —                            | —                   | —        |
| 20–24     | 3         | 0.12       | 0.02–0.34           | 29        | 8.47       | 4.48–10.08          | 73.18                        | 22.29–240.22        | <0.001   |
| 25–29     | 5         | 0.26       | 0.08–0.61           | 17        | 7.56       | 4.72–12.11          | 28.90                        | 10.66–78.34         | <0.001   |
| 30+       | 1         | 0.01       | 0.00–0.01           | 11        | 1.08       | 0.60–1.93           | 85.67                        | 11.06–663.57        | <0.001   |
| Total     | 136       | 0.48       | 0.41–0.57           | 413       | 11.25      | 10.22–12.39         | 23.32                        | 19.21–28.30         | <0.001   |

\*Average annual cumulative incidence calculated as number of cases divided by population at risk per 10,000 population.

<sup>†</sup>CI, confidence interval.

<sup>‡</sup>Incidence ratio comparing cumulative incidence in 2006–2007 (Kole, Lomela, and Tshudi-Loto health zones) to cumulative incidence in 1981–1986 (Kole and Bumba health zones).
